# Supplementary material
Source: ML conference proceedings conference paper supplement (https://openaccess.thecvf.com/content/cvpr_2016/html/Li_Weakly_Supervised_Object_2016_CVPR_paper.html)
Supplement: Supplementary file 1 [file Li_Weakly_Supervised_Object_2016_CVPR_supplemental.pdf]

# Weakly Supervised Object Localization with Progressive Domain Adaptation

## Supplementary Material

Dong Li<sup>1</sup>, Jia-Bin Huang<sup>2</sup>, Yali Li<sup>1</sup>, Shengjin Wang<sup>1\*</sup>, and Ming-Hsuan Yang<sup>3</sup>

<sup>1</sup>Tsinghua University, <sup>2</sup>University of Illinois, Urbana-Champaign, <sup>3</sup>University of California, Merced

### 1. Overview

In this supplementary material, we present three additional results to complement the paper. First, we report detailed quantitative evaluation on the PASCAL VOC and ILSVRC object detection datasets. Second, we show additional qualitative detection results on the VOC 2007 dataset. Third, we analyze the errors of three variants of the proposed approach and show relative contributions from each component.

### 2. Quantitative Evaluation

We show in Table 1, 2, and 3 the detection average precision (AP) performance of our method on the PASCAL VOC 2007, 2010 and 2012 datasets, respectively. In general, our algorithm achieves better localization performance for animal and vehicle than that for furniture classes. It is difficult to detect indoor objects in a weakly supervised manner due to large appearance variations and background clutters. Using the deeper model, the VGGNet, as our base CNN model, we achieve better performance than that from the AlexNet.

We also present the precision-recall curves for each category by our OM+MIL+FT-VGGNet method on the VOC 2007 *test* set in Figure 1, the VOC 2010 *val* set in Figure 2, and the VOC 2012 *val* set in Figure 3.

Table 4 and 5 show the per-class detection average precision performance of our method on the ILSVRC 2013 detection *val*<sub>2</sub> set. Similarly, we achieve better localization performance using the deeper network.

### 3. Sample detections

We show more sample detection results on the PASCAL VOC 2007 *test* set in Figure 4, 5, 6. All the detection results are obtained by our OM+MIL+FT-VGGNet method. Our algorithm is able to detect objects under different scales, lighting conditions and partial occlusions.

### 4. Error analysis

In Figure 8, we apply the detector error analysis tool from Hoiem et al. [1] to analyze errors of our detector on the VOC 2007 dataset. Comparing the first column (OM+MIL) with the third column (OM+MIL+FT), we find confusion with similar objects is significantly reduced by the detection adaptation step (FT), particularly for furniture classes. Fine-tuning the network for object-level detection helps learn discriminative appearance model for object categories. Comparing the second column (MIL+FT) with the third column (OM+MIL+FT), confusion with background (particularly for vehicle classes) and other objects (particularly for furniture classes) is reduced with our class-specific proposal mining (OM) step. With classification adaptation, the OM step helps remove a substantial amount of noise in the initial noisy class-independent proposal collection and mines out class-specific object candidates with high-precision.

From the error analysis plots, we note that the majority of errors comes from *inaccurate localization*. We show sample detection errors in Figure 7. Typical errors with imprecise localization include detecting a bicycle wheel, a bird body, or partial bus and car. Sometimes the detector gets confused with background or similar objects. The last two rows of Figure 7 show the detection errors due to confusion with background and similar objects, respectively. For example, we detect plant in lake and claim to detect potted plants. In the first image on the last row, we incorrectly detect a chair as a sofa.

### References

- [1] D. Hoiem, Y. Chodpathumwan, and Q. Dai. Diagnosing error in object detectors. In *ECCV*, 2012. 1

---

\*Corresponding author

Table 1. Quantitative evaluation in terms of detection average precision (AP) on the PASCAL VOC 2007 *test* set.

| Methods               | aero | bike | bird | boat | bottle | bus  | car  | cat  | chair | cow  | table | dog  | horse | mbike | person | plant | sheep | sofa | train | tv   | mAP  |
|-----------------------|------|------|------|------|--------|------|------|------|-------|------|-------|------|-------|-------|--------|-------|-------|------|-------|------|------|
| OM + MIL + FT-AlexNet | 49.7 | 33.6 | 30.8 | 19.9 | 13     | 40.5 | 54.3 | 37.4 | 14.8  | 39.8 | 9.4   | 28.8 | 38.1  | 49.8  | 14.5   | 24    | 27.1  | 12.1 | 42.3  | 39.7 | 31.0 |
| OM + MIL + FT-VGGNet  | 54.5 | 47.4 | 41.3 | 20.8 | 17.7   | 51.9 | 63.5 | 46.1 | 21.8  | 57.1 | 22.1  | 34.4 | 50.5  | 61.8  | 16.2   | 29.9  | 40.7  | 15.9 | 55.3  | 40.2 | 39.5 |

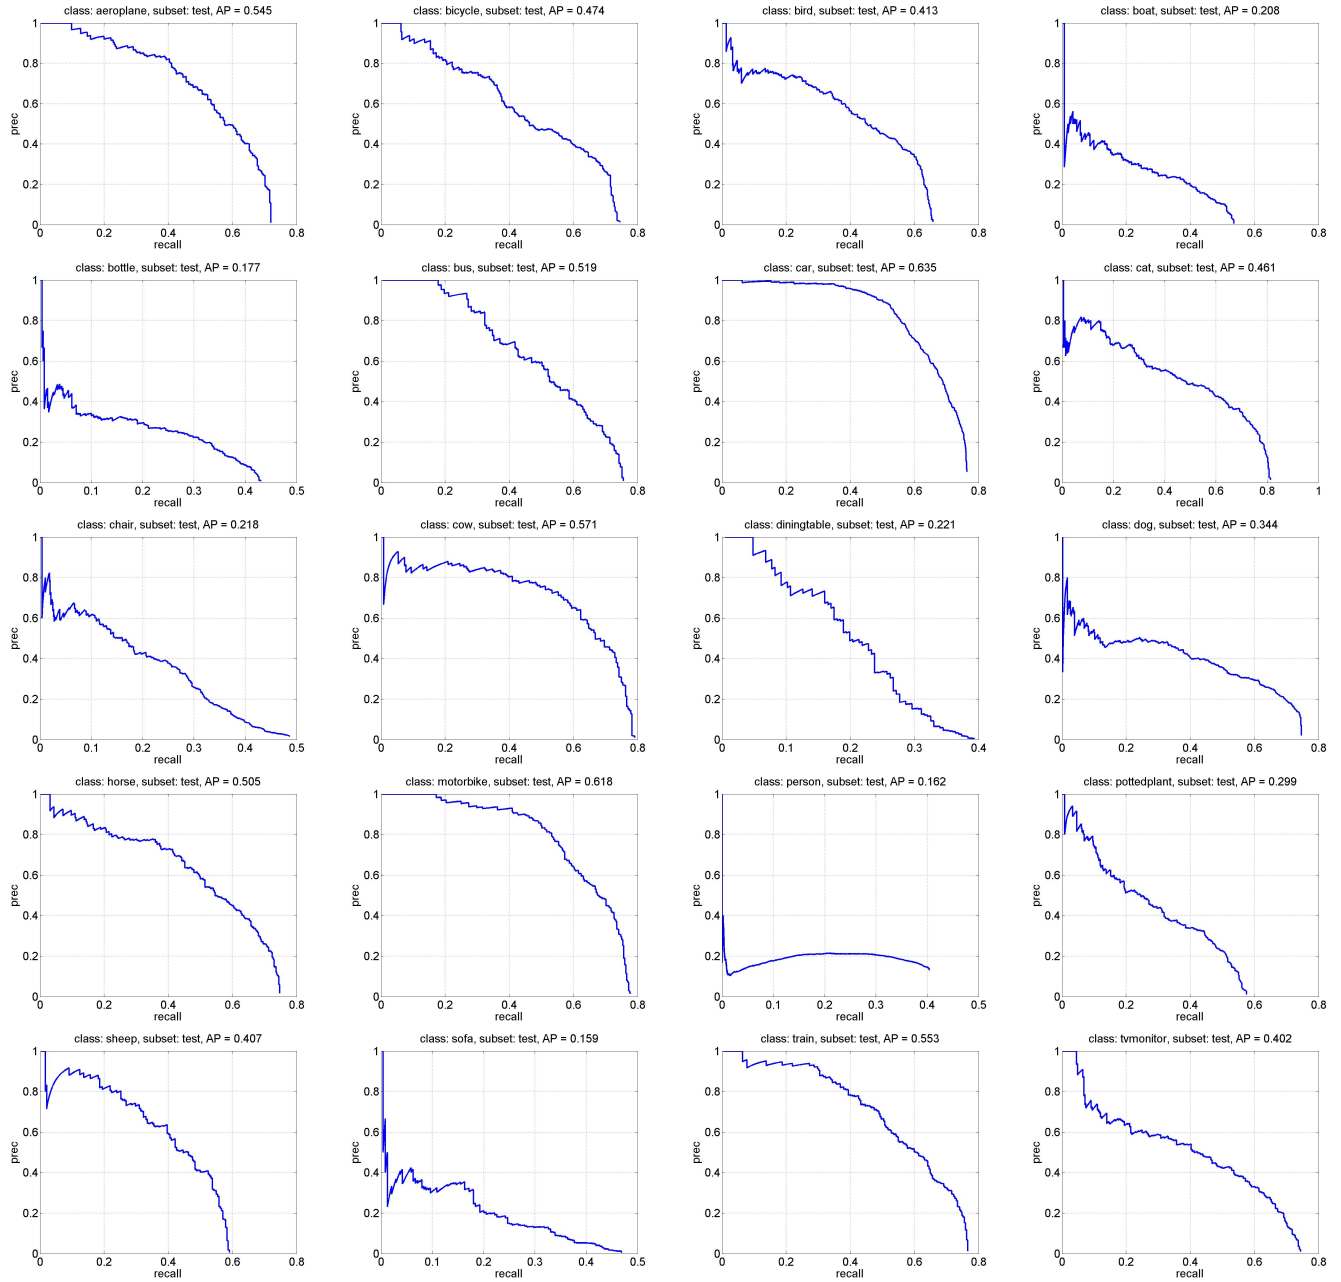

Figure 1. Precision-recall curves for each category on the PASCAL VOC 2007 *test* set.

Table 2. Quantitative evaluation in terms of detection average precision (AP) on the PASCAL VOC 2010 *val* set.

| Methods               | aero | bike | bird | boat | bottle | bus  | car  | cat  | chair | cow  | table | dog  | horse | mbike | person | plant | sheep | sofa | train | tv   | mAP  |
|-----------------------|------|------|------|------|--------|------|------|------|-------|------|-------|------|-------|-------|--------|-------|-------|------|-------|------|------|
| OM + MIL + FT-AlexNet | 37   | 26.7 | 17.3 | 7.1  | 8.7    | 55.3 | 27.4 | 34.8 | 6.2   | 18.7 | 4.2   | 20.7 | 28.4  | 39.6  | 8.9    | 11.3  | 22.6  | 6.4  | 23.3  | 22.7 | 21.4 |
| OM + MIL + FT-VGGNet  | 46.7 | 50.9 | 31.9 | 9.2  | 13.2   | 54.6 | 35.4 | 47.1 | 7.5   | 24.2 | 6.2   | 32.6 | 46.3  | 56.8  | 11.6   | 21.2  | 32.6  | 12   | 45.5  | 28.9 | 30.7 |

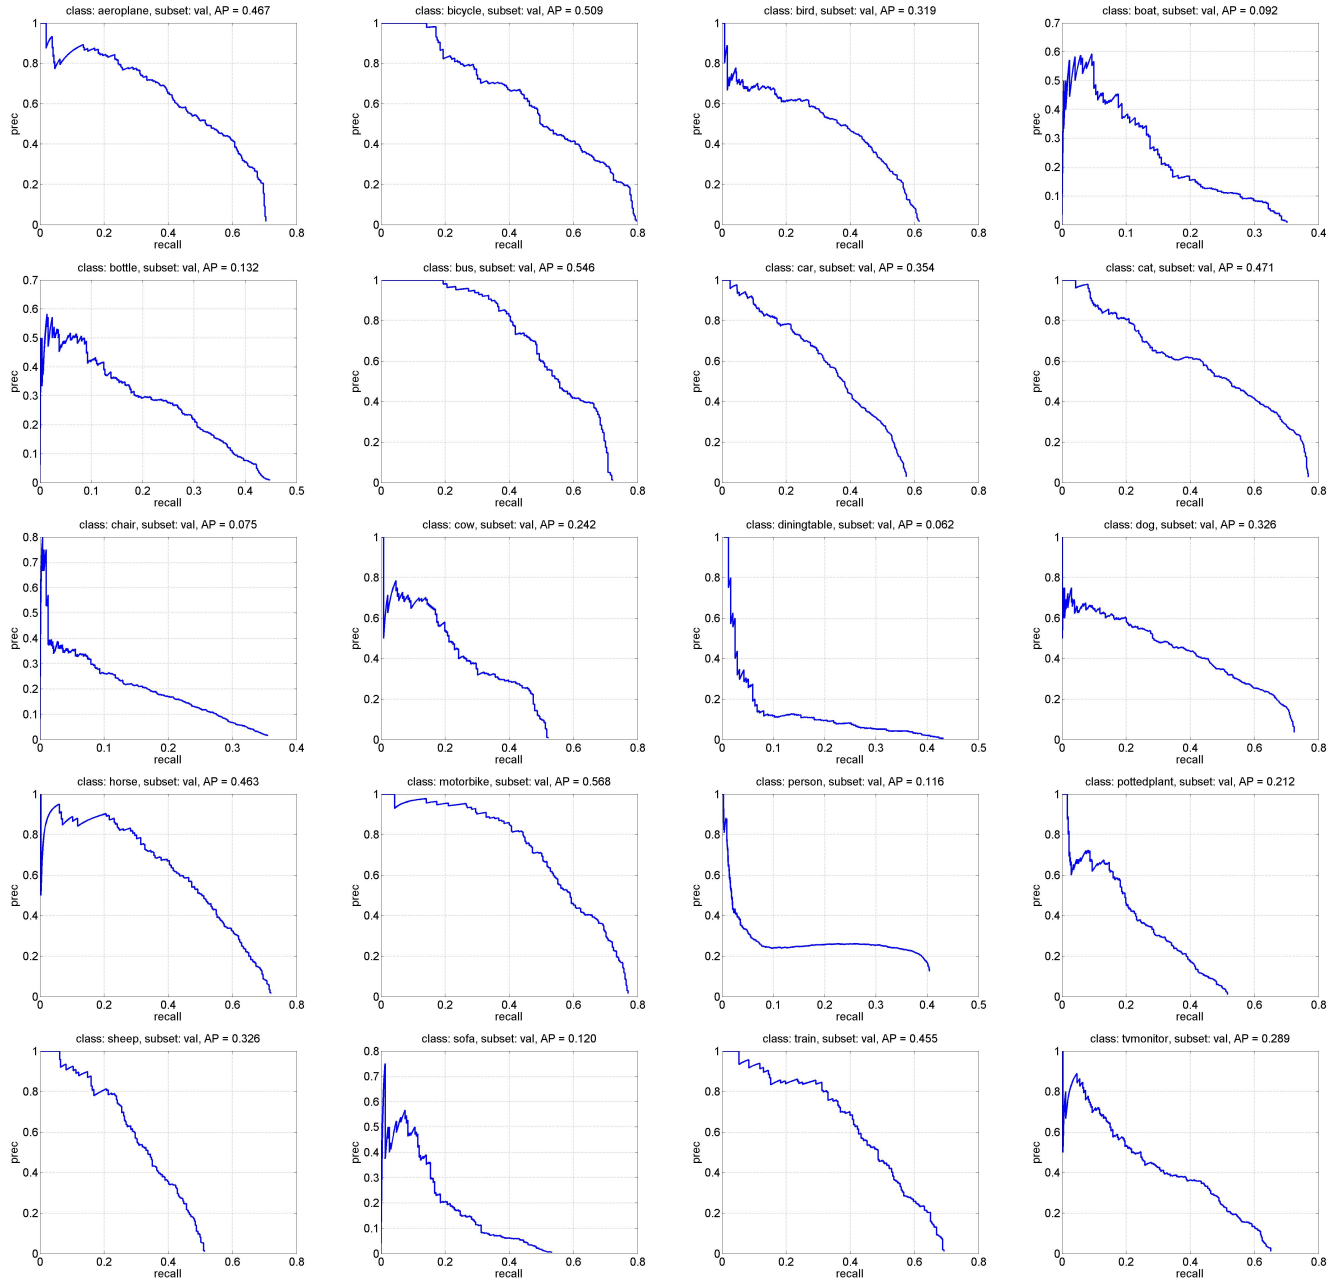

Figure 2. Precision-recall curves for each category on the PASCAL VOC 2010 *val* set.

Table 3. Quantitative evaluation in terms of detection average precision (AP) on the PASCAL VOC 2012 *val* set.

| Methods               | aero | bike | bird | boat | bottle | bus  | car  | cat  | chair | cow  | table | dog  | horse | mbike | person | plant | sheep | sofa | train | tv   | mAP  |
|-----------------------|------|------|------|------|--------|------|------|------|-------|------|-------|------|-------|-------|--------|-------|-------|------|-------|------|------|
| OM + MIL + FT-AlexNet | 33.7 | 27.8 | 19.9 | 5.7  | 6.5    | 49.6 | 28.1 | 37.3 | 7.6   | 17.4 | 2.8   | 23.3 | 33.7  | 40.4  | 8.9    | 13.7  | 22.3  | 5.5  | 36.4  | 26.7 | 22.4 |
| OM + MIL + FT-VGGNet  | 42.2 | 27.8 | 32.7 | 4.2  | 13.7   | 52.1 | 35.8 | 48.3 | 11.8  | 31.7 | 4.9   | 30.4 | 45.3  | 51.8  | 11.5   | 13.4  | 33.5  | 7.2  | 45.6  | 38.4 | 29.1 |

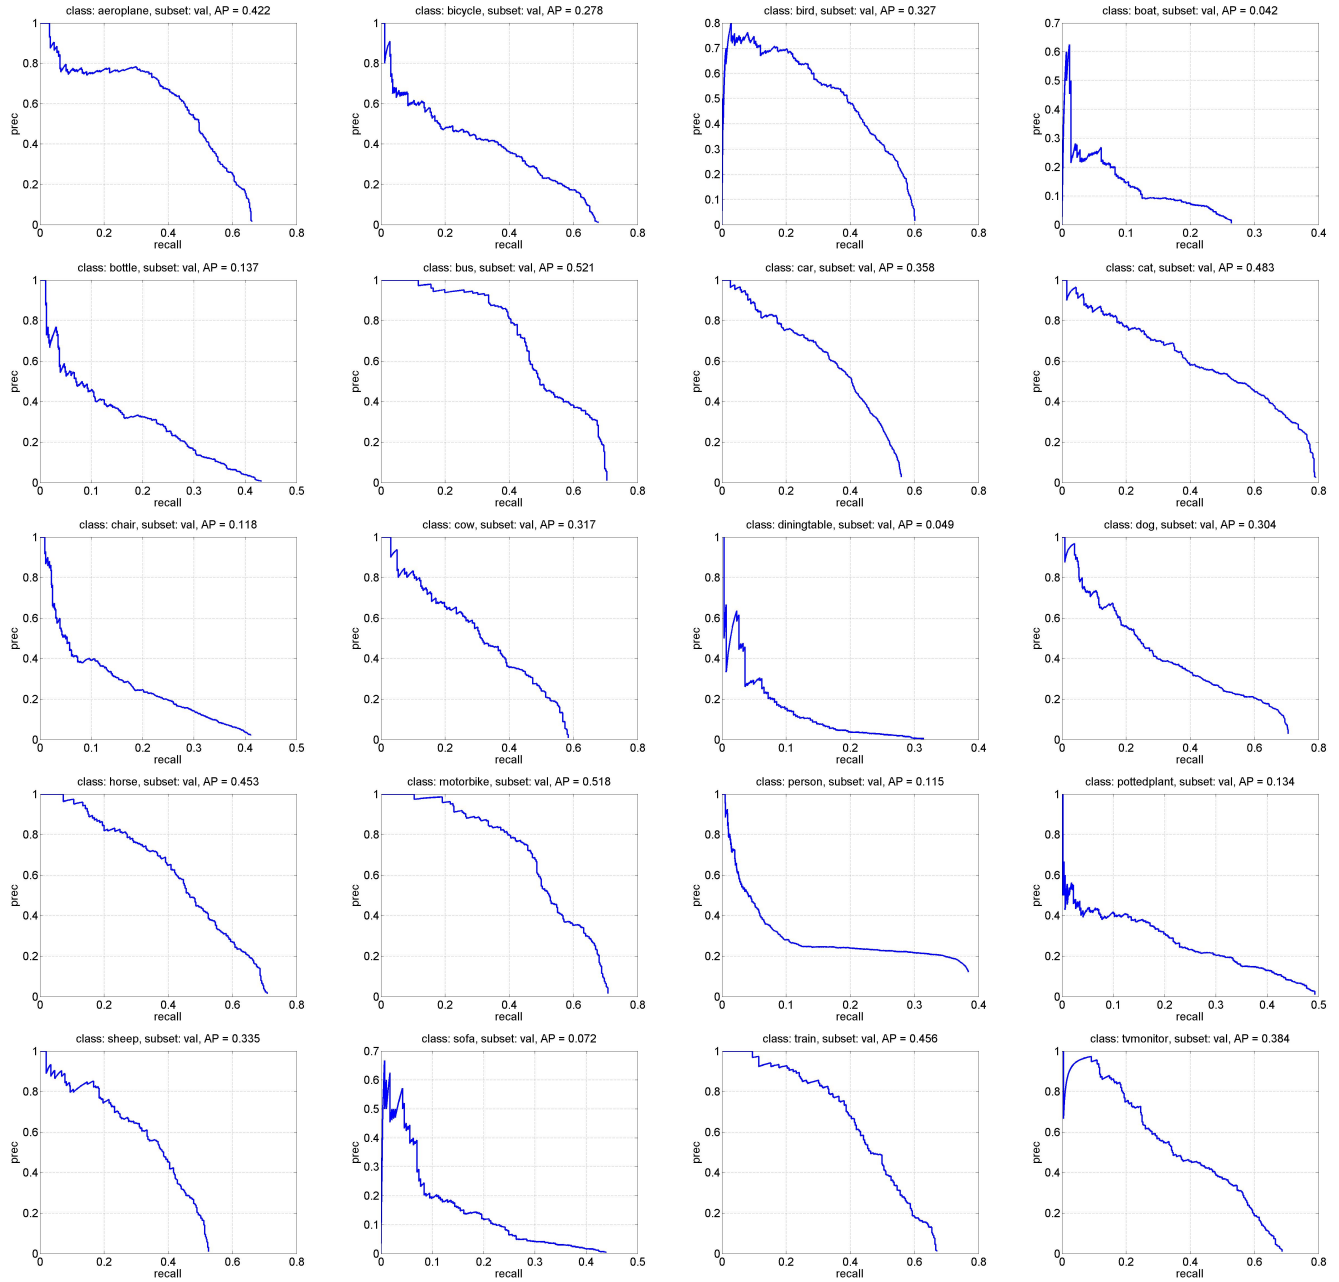

Figure 3. Precision-recall curves for each category on the PASCAL VOC 2012 *val* set.

Table 4. Per-class detection average precision (AP) on the ILSVRC2013 detection *val*<sub>2</sub> set by our OM+MIL+FT-AlexNet method.

| class        | AP   | class             | AP   | class                | AP   | class                 | AP   | class           | AP   |
|--------------|------|-------------------|------|----------------------|------|-----------------------|------|-----------------|------|
| accordion    | 14.0 | centipede         | 12.5 | hair spray           | 4.4  | pencil box            | 4.2  | snowplow        | 21.4 |
| airplane     | 14.9 | chain saw         | 1.1  | hamburger            | 15.3 | pencil sharpener      | 0.7  | soap dispenser  | 0.1  |
| ant          | 18.7 | chair             | 3.9  | hammer               | 0.4  | perfume               | 12.6 | soccer ball     | 14.3 |
| antelope     | 9.3  | chime             | 12.7 | hamster              | 26.9 | person                | 0.5  | sofa            | 2.7  |
| apple        | 9.5  | cocktail shaker   | 6.9  | harmonica            | 0.4  | piano                 | 13.2 | spatula         | 0.2  |
| armadillo    | 38.0 | coffee maker      | 1.5  | harp                 | 13.4 | pineapple             | 9.5  | squirrel        | 14.2 |
| artichoke    | 3.1  | computer keyboard | 4.9  | hat with a wide brim | 1.6  | ping-pong ball        | 0.0  | starfish        | 9.5  |
| axe          | 0.2  | computer mouse    | 0.0  | head cabbage         | 1.0  | pitcher               | 5.1  | stethoscope     | 0.1  |
| baby bed     | 10.6 | corkscrew         | 1.0  | helmet               | 0.3  | pizza                 | 3.9  | stove           | 0.6  |
| backpack     | 1.0  | cream             | 2.0  | hippopotamus         | 13.3 | plastic bag           | 0.1  | strainer        | 1.5  |
| bagel        | 3.1  | croquet ball      | 0.0  | horizontal bar       | 0.5  | plate rack            | 0.2  | strawberry      | 5.1  |
| balance beam | 0.1  | crutch            | 0.1  | horse                | 14.4 | pomegranate           | 1.1  | stretcher       | 0.4  |
| banana       | 5.2  | cucumber          | 2.4  | hotdog               | 7.0  | popsicle              | 1.8  | sunglasses      | 1.6  |
| band aid     | 0.6  | cup or mug        | 12.7 | iPod                 | 23.6 | porcupine             | 17.2 | swimming trunks | 0.0  |
| banjo        | 7.6  | diaper            | 0.0  | isopod               | 9.2  | power drill           | 1.0  | swine           | 27.1 |
| baseball     | 12.3 | digital clock     | 2.5  | jellyfish            | 3.2  | pretzel               | 4.2  | syringe         | 0.0  |
| basketball   | 0.0  | dishwasher        | 0.1  | koala bear           | 13.1 | printer               | 3.4  | table           | 0.8  |
| bathing cap  | 1.2  | dog               | 24.0 | ladle                | 0.0  | puck                  | 0.0  | tape player     | 8.8  |
| beaker       | 6.5  | domestic cat      | 8.8  | ladybug              | 16.6 | punching bag          | 3.0  | tennis ball     | 12.3 |
| bear         | 33.3 | dragonfly         | 17.0 | lamp                 | 1.1  | purse                 | 4.6  | tick            | 29.8 |
| bee          | 12.4 | drum              | 0.5  | laptop               | 1.4  | rabbit                | 35.2 | tie             | 0.1  |
| bell pepper  | 3.7  | dumbbell          | 2.0  | lemon                | 10.2 | racket                | 0.0  | tiger           | 14.5 |
| bench        | 1.2  | electric fan      | 0.0  | lion                 | 3.4  | ray                   | 6.9  | toaster         | 22.9 |
| bicycle      | 12.1 | elephant          | 23.2 | lipstick             | 4.6  | red panda             | 12.0 | traffic light   | 0.5  |
| binder       | 1.0  | face powder       | 5.8  | lizard               | 4.5  | refrigerator          | 1.9  | train           | 21.1 |
| bird         | 28.4 | fig               | 1.9  | lobster              | 4.2  | remote control        | 4.7  | trombone        | 0.2  |
| bookshelf    | 2.4  | filing cabinet    | 4.9  | maillot              | 0.2  | rubber eraser         | 0.1  | trumpet         | 3.3  |
| bow tie      | 0.0  | flower pot        | 0.3  | maraca               | 11.3 | rugby ball            | 0.1  | turtle          | 25.3 |
| bow          | 0.6  | flute             | 0.2  | microphone           | 0.0  | ruler                 | 0.4  | tv or monitor   | 8.1  |
| bowl         | 4.6  | fox               | 28.1 | microwave            | 0.8  | salt or pepper shaker | 6.6  | unicycle        | 0.2  |
| brassiere    | 0.2  | french horn       | 0.5  | milk can             | 11.8 | saxophone             | 2.7  | vacuum          | 2.5  |
| burrito      | 3.3  | frog              | 11.2 | miniskirt            | 0.0  | scorpion              | 23.7 | violin          | 1.6  |
| bus          | 21.0 | frying pan        | 0.4  | monkey               | 19.2 | screwdriver           | 0.1  | volleyball      | 0.0  |
| butterfly    | 62.3 | giant panda       | 41.1 | motorcycle           | 20.5 | seal                  | 1.6  | waffle iron     | 1.6  |
| camel        | 5.3  | goldfish          | 8.8  | mushroom             | 11.4 | sheep                 | 10.9 | washer          | 7.7  |
| can opener   | 2.5  | golf ball         | 17.4 | nail                 | 0.0  | ski                   | 0.2  | water bottle    | 2.0  |
| car          | 14.9 | golfcart          | 54.7 | neck brace           | 0.1  | skunk                 | 8.5  | watercraft      | 6.0  |
| cart         | 23.3 | guacamole         | 12.0 | oboe                 | 9.8  | snail                 | 11.3 | whale           | 0.0  |
| cattle       | 9.8  | guitar            | 6.4  | orange               | 3.8  | snake                 | 5.1  | wine bottle     | 1.5  |
| cello        | 8.8  | hair dryer        | 1.6  | otter                | 2.2  | snowmobile            | 2.5  | zebra           | 13.4 |

Table 5. Per-class detection average precision (AP) on the ILSVRC2013 detection *val*<sub>2</sub> set by our OM+MIL+FT-VGGNet method.

| class        | AP   | class             | AP   | class                | AP   | class                 | AP   | class           | AP   |
|--------------|------|-------------------|------|----------------------|------|-----------------------|------|-----------------|------|
| accordion    | 15.9 | centipede         | 14.6 | hair spray           | 1.8  | pencil box            | 3.4  | snowplow        | 18.0 |
| airplane     | 24.0 | chain saw         | 4.8  | hamburger            | 12.9 | pencil sharpener      | 0.5  | soap dispenser  | 1.1  |
| ant          | 24.6 | chair             | 4.7  | hammer               | 0.5  | perfume               | 19.8 | soccer ball     | 21.7 |
| antelope     | 13.7 | chime             | 15.3 | hamster              | 43.0 | person                | 0.6  | sofa            | 5.2  |
| apple        | 8.1  | cocktail shaker   | 7.3  | harmonica            | 4.5  | piano                 | 6.0  | spatula         | 0.1  |
| armadillo    | 50.5 | coffee maker      | 6.0  | harp                 | 28.9 | pineapple             | 16.8 | squirrel        | 23.8 |
| artichoke    | 4.1  | computer keyboard | 9.8  | hat with a wide brim | 5.1  | ping-pong ball        | 0.6  | starfish        | 18.8 |
| axe          | 1.7  | computer mouse    | 0.0  | head cabbage         | 4.9  | pitcher               | 11.9 | stethoscope     | 2.2  |
| baby bed     | 19.3 | corkscrew         | 10.2 | helmet               | 0.5  | pizza                 | 6.5  | stove           | 2.5  |
| backpack     | 0.7  | cream             | 4.4  | hippopotamus         | 6.7  | plastic bag           | 1.7  | strainer        | 4.9  |
| bagel        | 7.4  | croquet ball      | 0.1  | horizontal bar       | 0.4  | plate rack            | 3.4  | strawberry      | 8.4  |
| balance beam | 0.1  | crutch            | 1.1  | horse                | 19.8 | pomegranate           | 4.4  | stretcher       | 0.7  |
| banana       | 6.9  | cucumber          | 4.7  | hotdog               | 11.0 | popsicle              | 1.6  | sunglasses      | 2.3  |
| band aid     | 3.2  | cup or mug        | 17.8 | iPod                 | 31.2 | porcupine             | 40.9 | swimming trunks | 0.0  |
| banjo        | 6.7  | diaper            | 0.8  | isopod               | 24.2 | power drill           | 2.1  | swine           | 39.6 |
| baseball     | 18.1 | digital clock     | 9.0  | jellyfish            | 1.0  | pretzel               | 2.0  | syringe         | 1.3  |
| basketball   | 0.0  | dishwasher        | 0.6  | koala bear           | 21.1 | printer               | 8.7  | table           | 0.9  |
| bathing cap  | 0.8  | dog               | 40.2 | ladle                | 0.6  | puck                  | 0.0  | tape player     | 9.6  |
| beaker       | 4.4  | domestic cat      | 22.1 | ladybug              | 20.6 | punching bag          | 8.4  | tennis ball     | 17.5 |
| bear         | 45.8 | dragonfly         | 26.0 | lamp                 | 1.5  | purse                 | 8.1  | tick            | 7.3  |
| bee          | 11.4 | drum              | 0.3  | laptop               | 4.7  | rabbit                | 47.1 | tie             | 0.1  |
| bell pepper  | 9.6  | dumbbell          | 4.4  | lemon                | 11.7 | racket                | 0.5  | tiger           | 27.3 |
| bench        | 1.8  | electric fan      | 0.3  | lion                 | 17.6 | ray                   | 12.6 | toaster         | 23.2 |
| bicycle      | 13.6 | elephant          | 33.6 | lipstick             | 1.8  | red panda             | 11.0 | traffic light   | 0.6  |
| binder       | 2.2  | face powder       | 5.5  | lizard               | 19.1 | refrigerator          | 15.0 | train           | 19.0 |
| bird         | 40.8 | fig               | 4.4  | lobster              | 11.3 | remote control        | 11.3 | trombone        | 2.0  |
| bookshelf    | 1.3  | filing cabinet    | 6.2  | maillot              | 0.4  | rubber eraser         | 0.1  | trumpet         | 5.5  |
| bow tie      | 0.0  | flower pot        | 0.8  | maraca               | 11.1 | rugby ball            | 0.1  | turtle          | 35.6 |
| bow          | 3.3  | flute             | 0.0  | microphone           | 0.0  | ruler                 | 0.9  | tv or monitor   | 6.6  |
| bowl         | 6.9  | fox               | 35.0 | microwave            | 3.4  | salt or pepper shaker | 2.8  | unicycle        | 0.4  |
| brassiere    | 1.6  | french horn       | 2.0  | milk can             | 22.3 | saxophone             | 11.5 | vacuum          | 10.8 |
| burrito      | 4.2  | frog              | 27.0 | miniskirt            | 0.1  | scorpion              | 28.1 | violin          | 4.8  |
| bus          | 25.5 | frying pan        | 2.4  | monkey               | 29.8 | screwdriver           | 0.1  | volleyball      | 0.0  |
| butterfly    | 64.9 | giant panda       | 49.1 | motorcycle           | 21.0 | seal                  | 5.8  | waffle iron     | 3.9  |
| camel        | 9.2  | goldfish          | 7.9  | mushroom             | 13.2 | sheep                 | 20.8 | washer          | 3.7  |
| can opener   | 8.1  | golf ball         | 22.2 | nail                 | 0.0  | ski                   | 0.1  | water bottle    | 2.9  |
| car          | 19.4 | golfcart          | 55.0 | neck brace           | 0.0  | skunk                 | 8.6  | watercraft      | 12.0 |
| cart         | 18.5 | guacamole         | 14.4 | oboe                 | 1.4  | snail                 | 13.3 | whale           | 0.0  |
| cattle       | 17.0 | guitar            | 11.2 | orange               | 3.2  | snake                 | 13.7 | wine bottle     | 1.8  |
| cello        | 6.1  | hair dryer        | 4.4  | otter                | 5.0  | snowmobile            | 6.0  | zebra           | 29.5 |

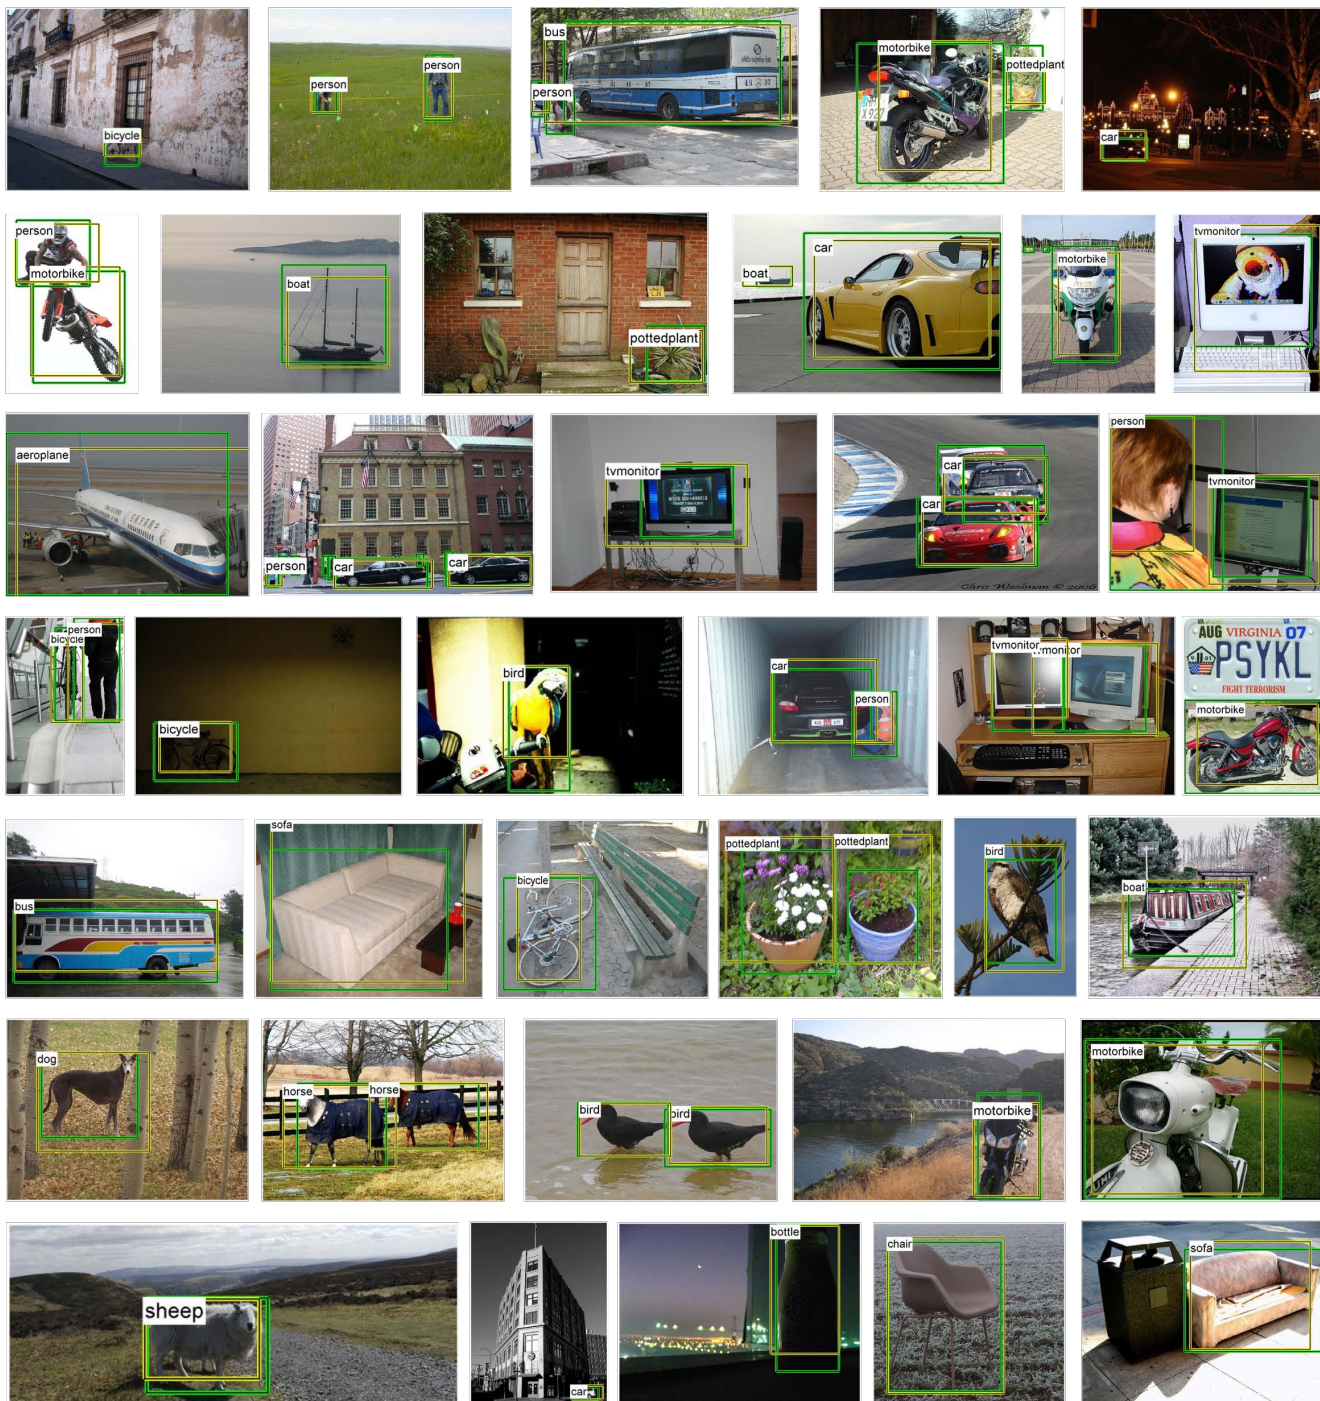

Figure 4. Sample detection results on the PASCAL VOC 2007 *test* set. Green boxes indicate ground-truth instance annotation. Yellow boxes indicate correction detections (with  $\text{IoU} \geq 0.5$ ). For all the testing results, we set threshold of detection as 0.8 and use NMS to remove duplicate detections.

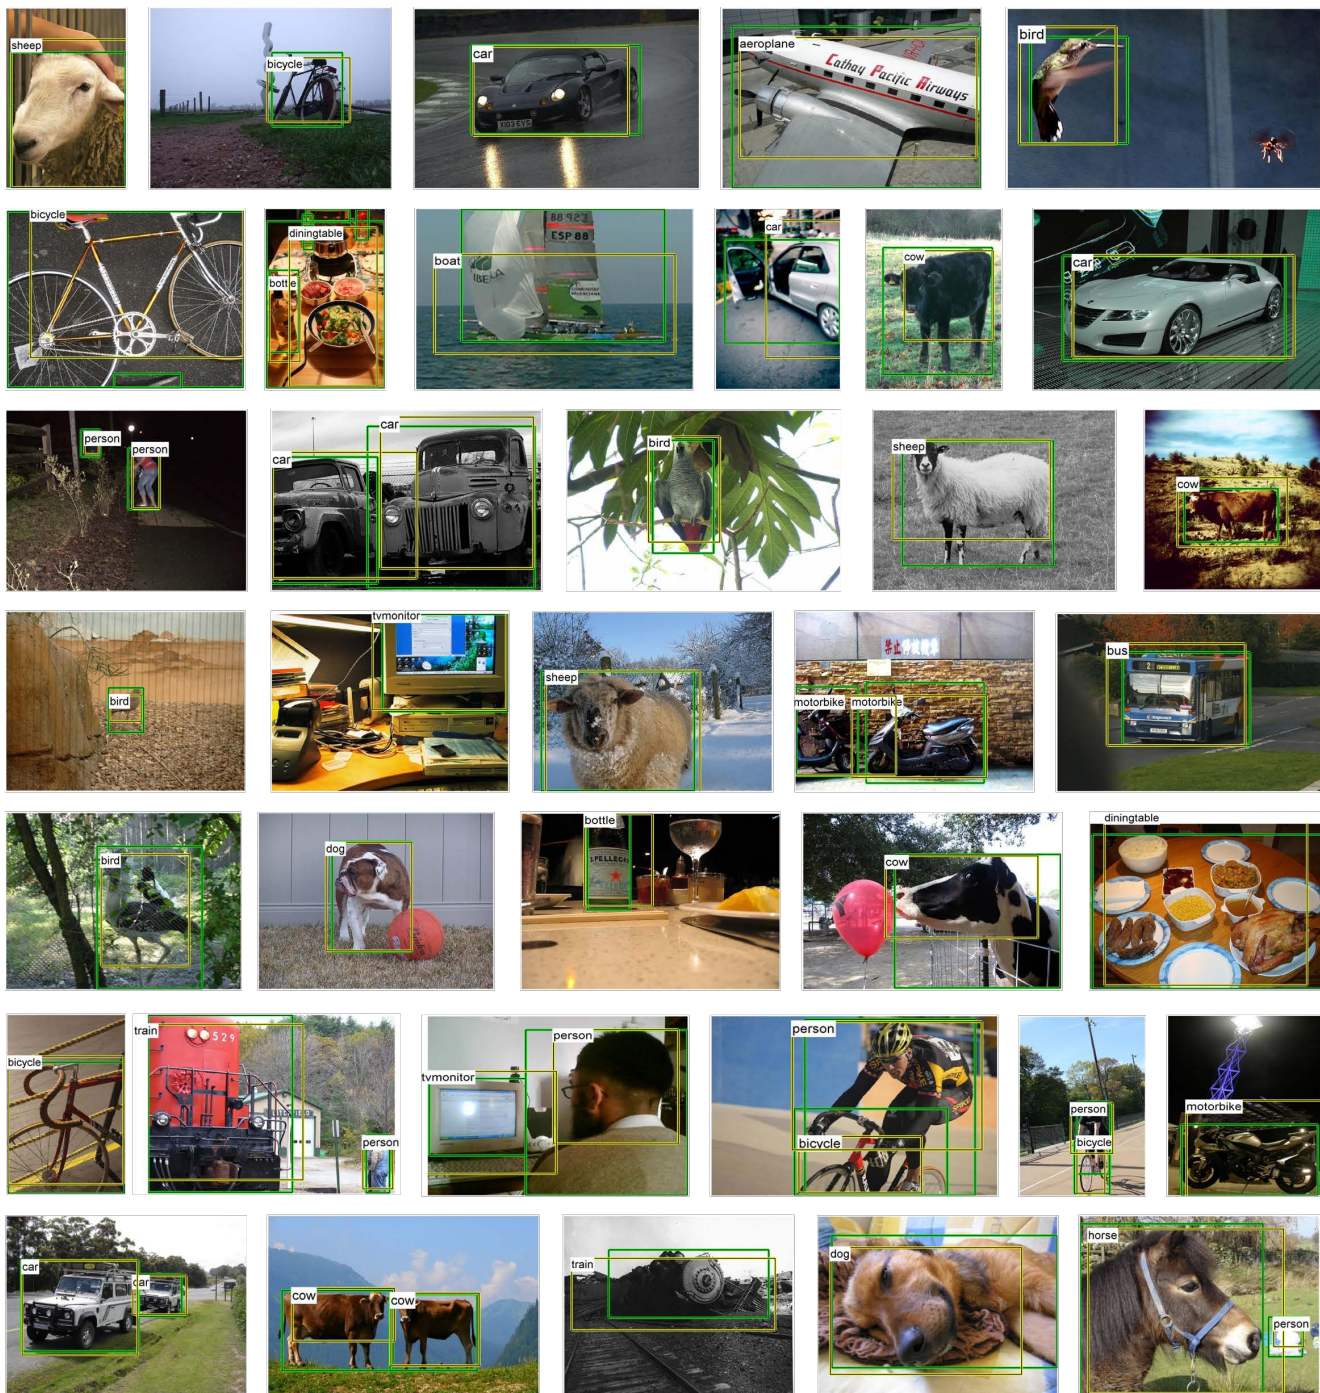

Figure 5. Sample detection results on the PASCAL VOC 2007 *test* set. Green boxes indicate ground-truth instance annotation. Yellow boxes indicate correction detections (with  $\text{IoU} \geq 0.5$ ). For all the testing results, we set threshold of detection as 0.8 and use NMS to remove duplicate detections.

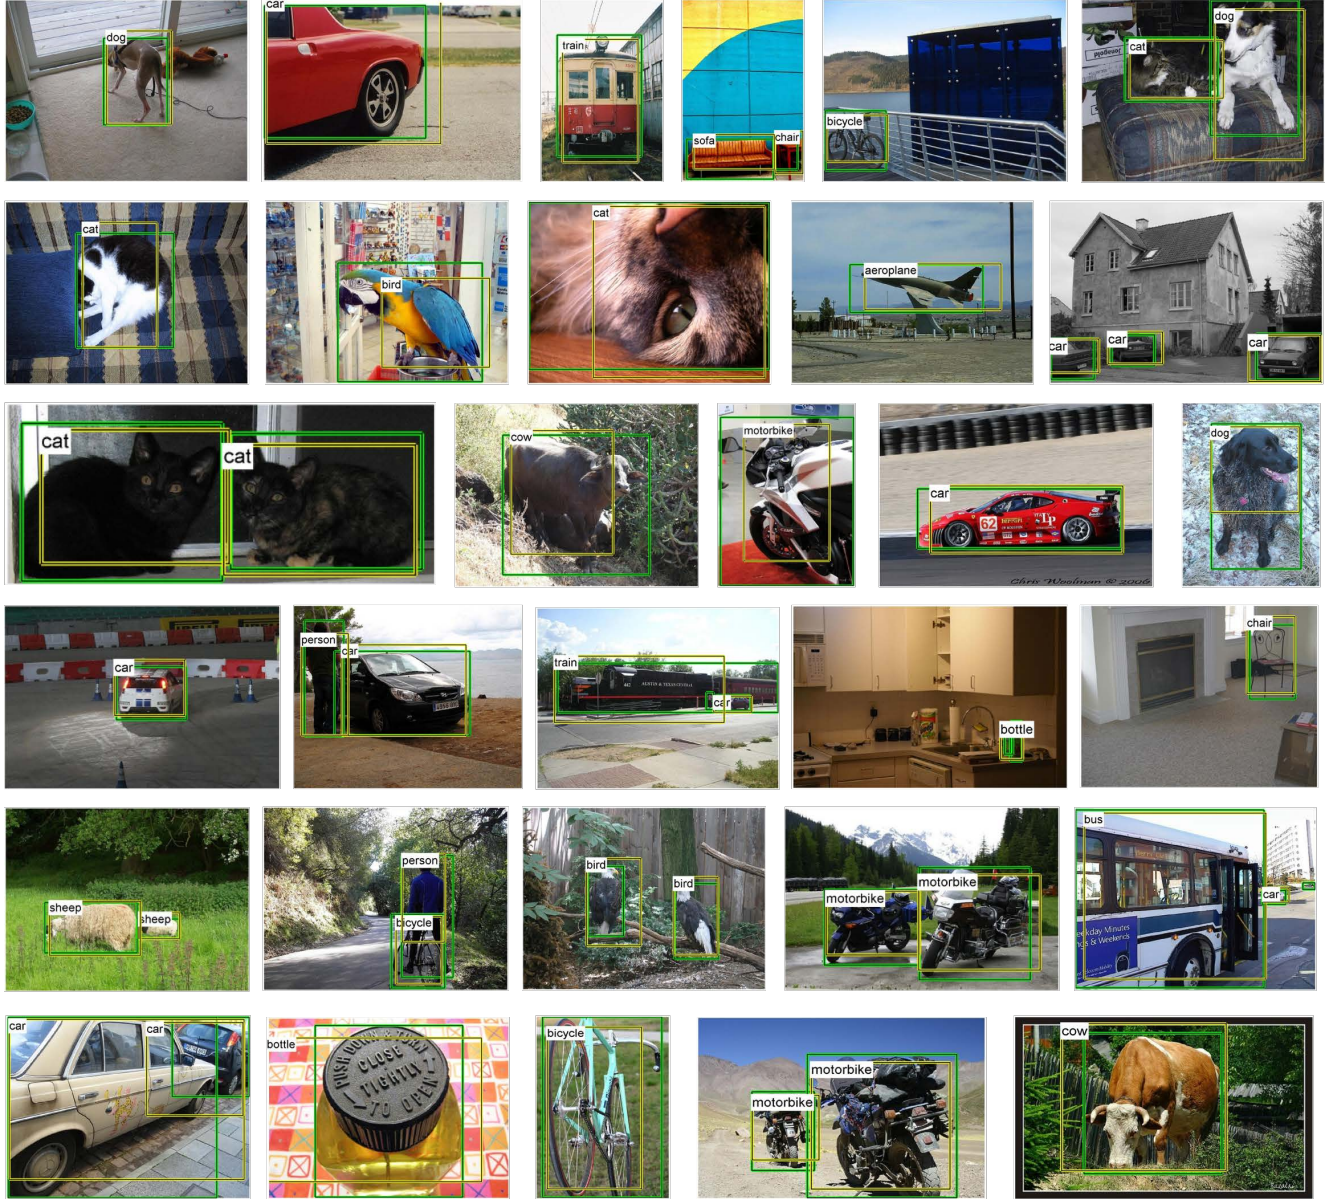

Figure 6. Sample detection results on the PASCAL VOC 2007 *test* set. Green boxes indicate ground-truth instance annotation. Yellow boxes indicate correction detections (with  $\text{IoU} \geq 0.5$ ). For all the testing results, we set threshold of detection as 0.8 and use NMS to remove duplicate detections.

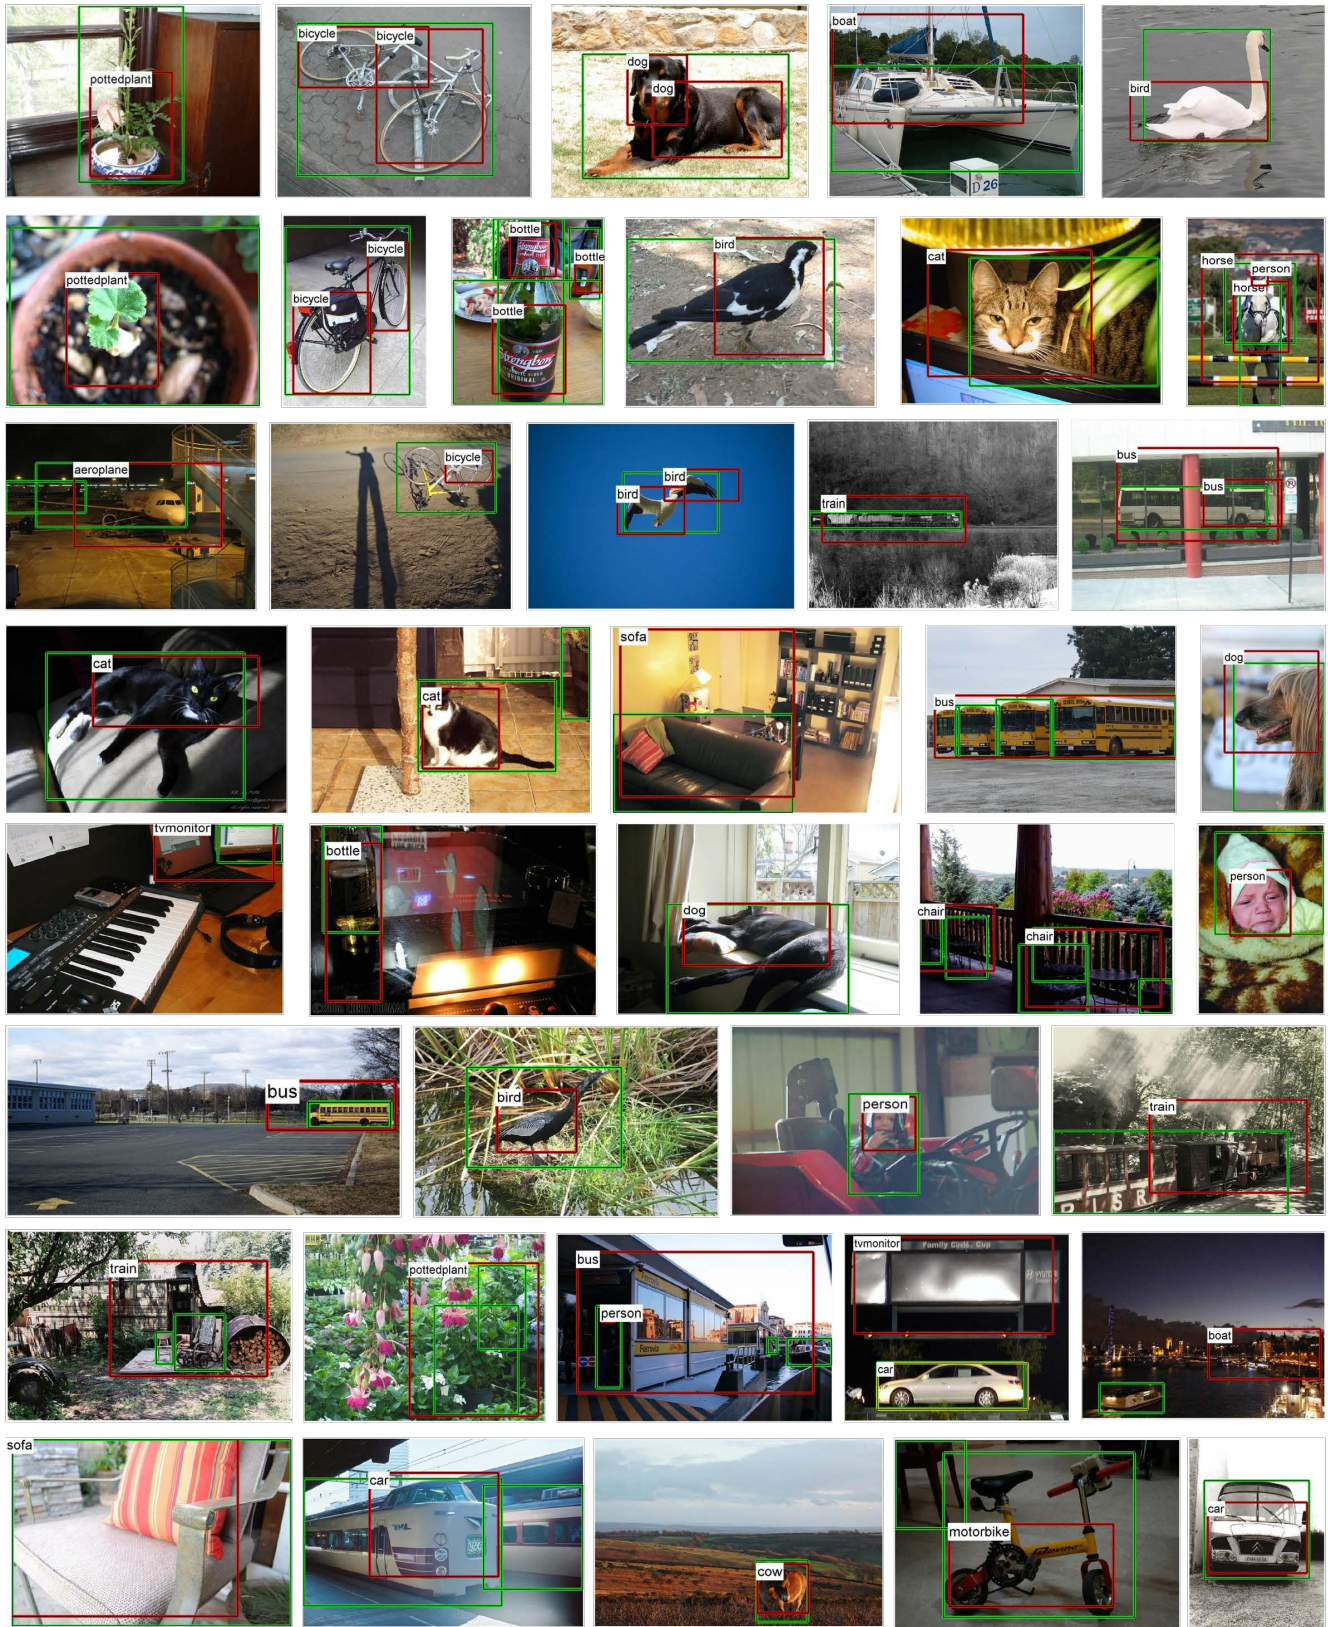

Figure 7. Additional sample results of detection errors. Green boxes indicate ground-truth instance annotation. Red boxes indicate false positives.

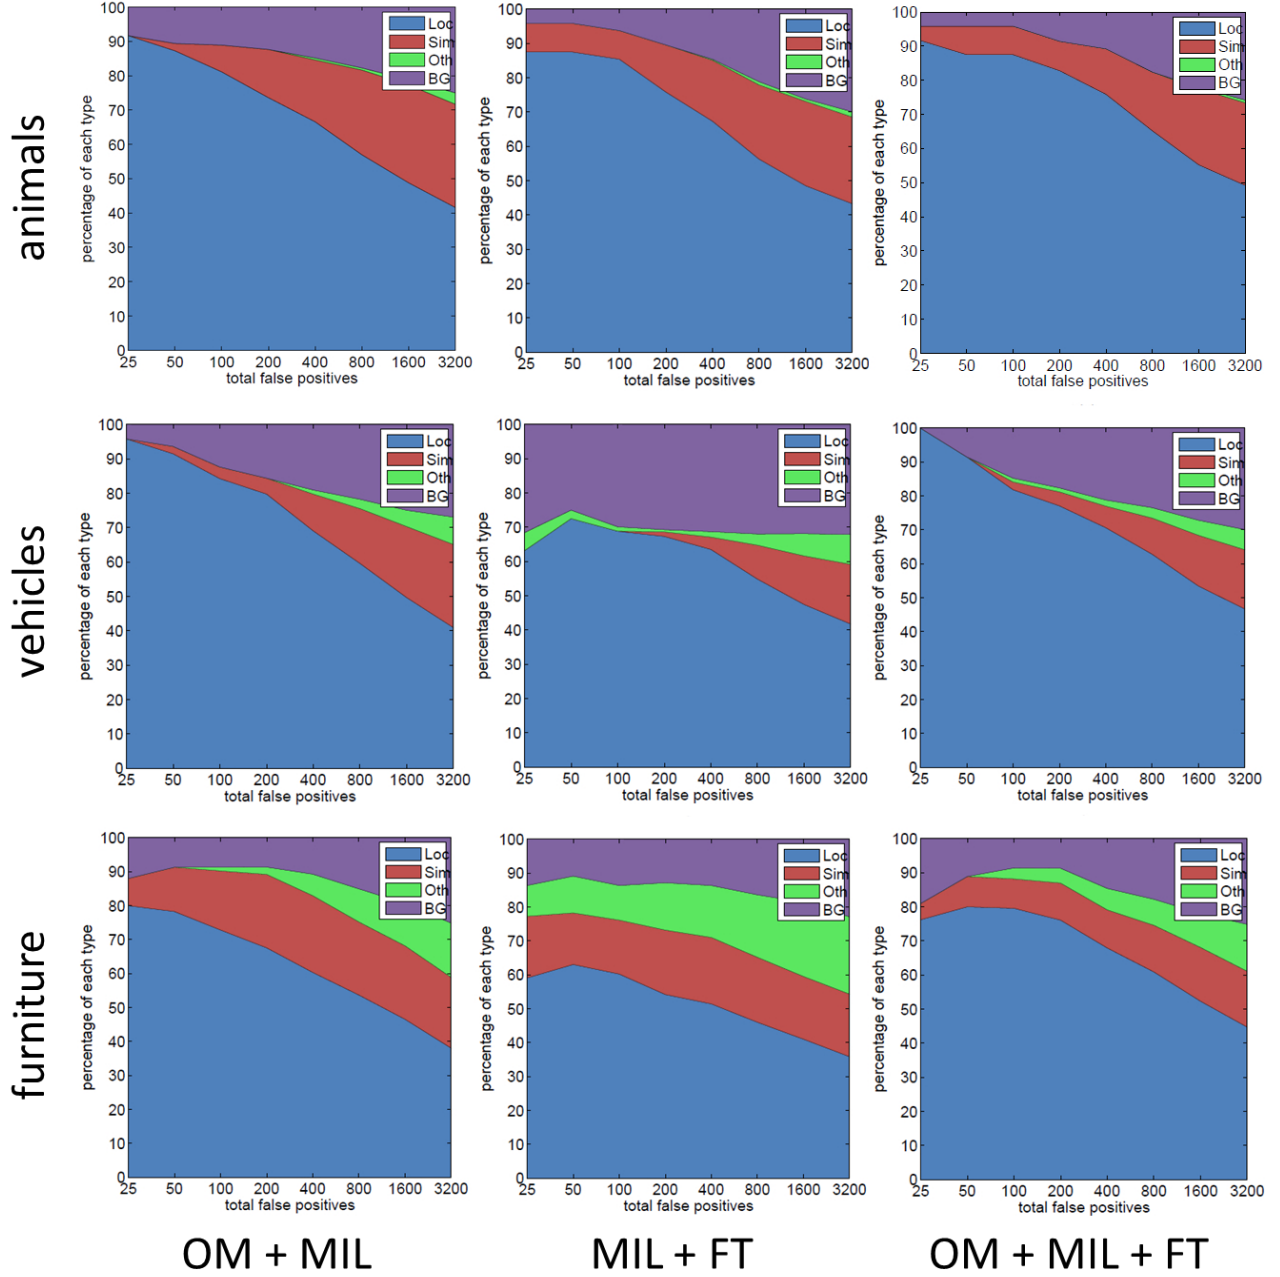

Figure 8. Detector error analysis. The detection errors are categorized into four types: false positives due to poor localization (Loc), confusion with similar objects (Sim), confusion with other VOC objects (Oth), and confusion with background (BG). The stacked area plots show fraction of FP of each type as the total number of FP increase. We take examples of animal, vehicle and furniture classes. The results of “MIL+FT” and “OM+MIL+FT” are obtained using the VGGNet.
